# Supplementary material for: Na/K-ATPase as a target for anticancer metal based drugs: insights into molecular interactions with selected gold(iii) complexes
Source: Royal Society of Chemistry journal article supplement (doi:10.1039/c7mt00017k), 2017-01-01
Supplement: c7mt00017k1.pdf [file c7mt00017k1.pdf]

## Na/K-ATPase as a target for anticancer metal based drugs: insights into the molecular interactions with selected gold(III) complexes

Aleksandra M. Bondžić<sup>a</sup>, Goran V. Janjić<sup>b</sup>, Miroslav D. Dramićanin<sup>a</sup>, Luigi Messori<sup>c\*</sup>, Lara Massai<sup>c</sup>, Tatjana N. Parac Vogt<sup>d</sup>, Vesna M. Vasić<sup>a\*</sup>

<sup>a</sup>Department of Physical Chemistry, Vinča Institute of Nuclear Sciences, University of Belgrade, Belgrade, Serbia

<sup>b</sup>Institute of Chemistry, Metallurgy and Technology, University of Belgrade, Belgrade, Serbia.

<sup>c</sup>Department of Chemistry, University of Florence, Sesto Fiorentino, Italy

<sup>d</sup>Department of Chemistry, KU Leuven, Belgium

### 1. Tryptophan distribution in Na, K-ATPase

Na/K ATPase is an enzyme rich in Trp residues.[1] There is a total of 16 tryptophan residues (Trp), 12 of them being situated in  $\alpha$ -subunit and 4 in  $\beta$ -subunit; no Trp residues are in the  $\gamma$ -subunit. Most of Trp residues from the  $\alpha$ -subunit (10 Trp) are located in trans-membrane domain (Trp82, Trp98, Trp310, Trp883, Trp887, Trp899, Trp924, Trp980, Trp981, and Trp1009), and only two residues (Trp385 and Trp411) are located in the intracellular domain (N domain). Three tryptophan residues from  $\beta$ -subunit are located in trans-membrane domain (Trp12, Trp17, and Trp32), and one residue (Trp155) is located in extracellular part of  $\beta$ -subunit. The distribution of tryptophan residues is illustrated in Fig. S1.

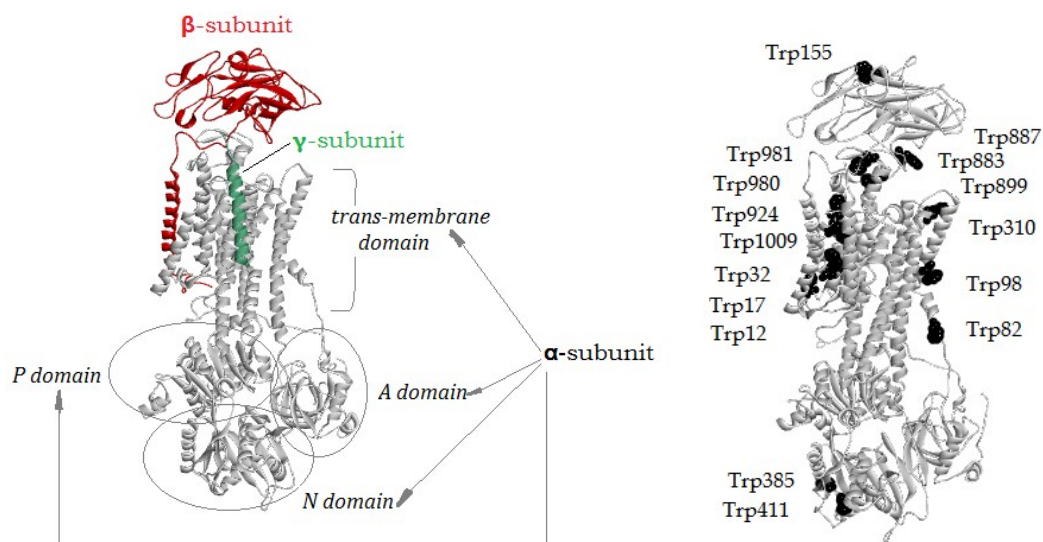

Fig. S1 The structure of Na/K ATPase and distribution of Trp residues in the Na/K ATPase in E1 state.

## 2. Influence of gold (III) complexes on Na,K-ATPase fluorescence spectra

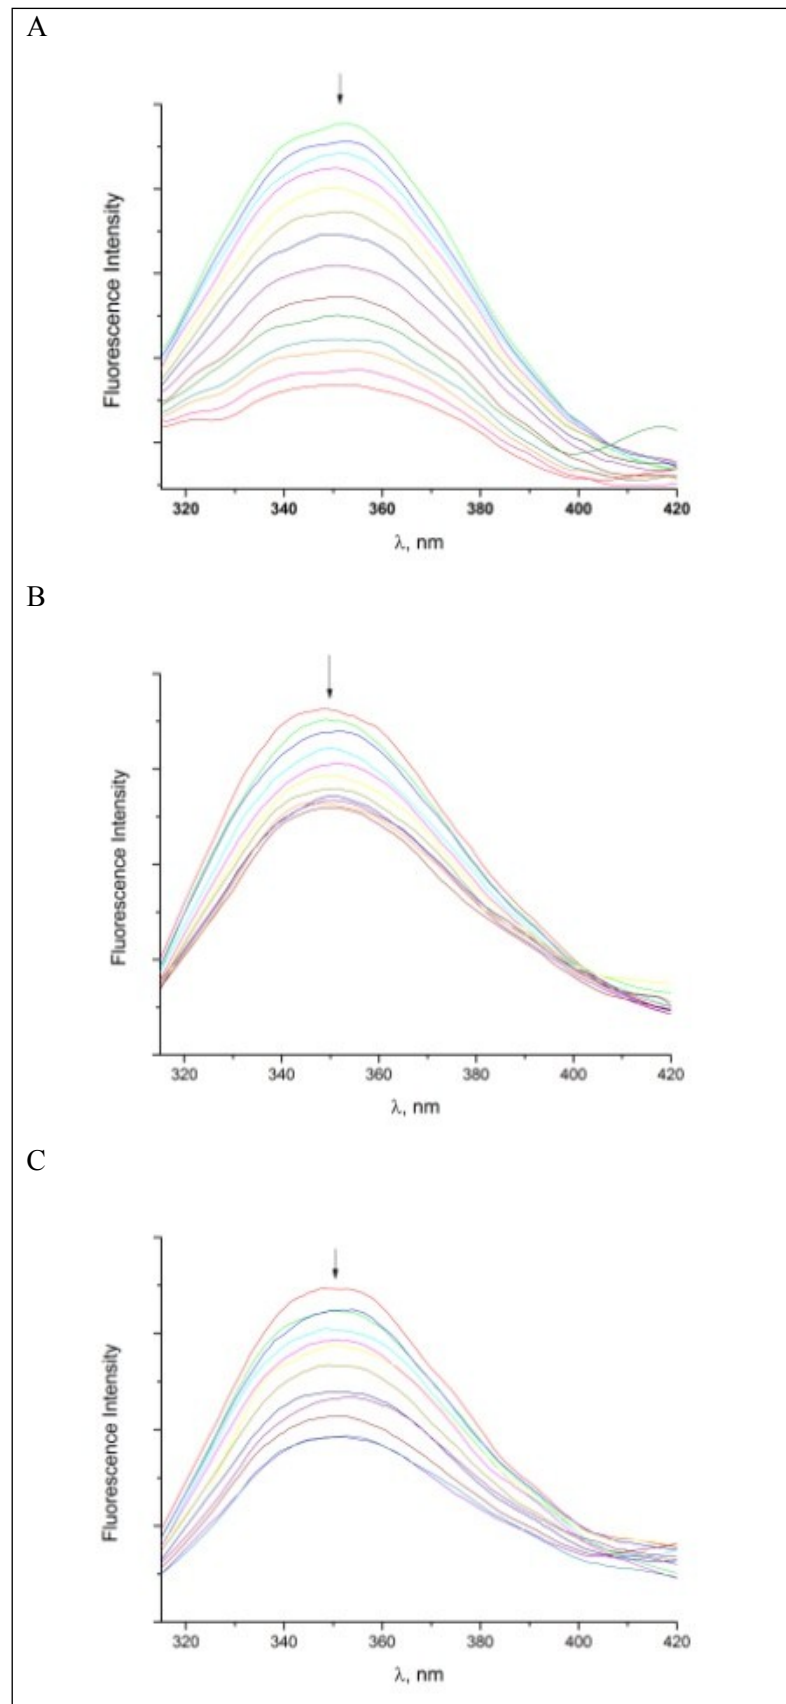

Fig. S2 Fluorescence spectra of the Na/K-ATPase – gold complex assembly. A) **Complex 3** in concentration range from  $1 \times 10^{-8}$  to  $1.25 \times 10^{-5}$  M, the concentration of Na/K-ATPase is  $1 \times 10^{-7}$  M. B) **Complex 1** in concentration range from  $1 \times 10^{-8}$  to  $6.5 \times 10^{-6}$  M, the concentration of Na/K-ATPase is  $5 \times 10^{-8}$  M. C) **Complex 2** in concentration range from  $1 \times 10^{-8}$  to  $5.5 \times 10^{-6}$  M, the concentration of Na/K-ATPase is  $5 \times 10^{-8}$  M. The solution contains 100 mM NaCl, pH of solution is 7.4. The enzyme is in  $E_1(\text{Na}^+)_3$  conformation. The fluorescence intensity decreased with the increasing of gold complex concentration in the direction of arrow.

### 3. Stern Volmer plot

Stern Volmer plot for fluorescence quenching is described by Eq. S1:

$$\frac{I_0}{I} = 1 + K_{SV}[\text{Au}] = k_q \tau_0 [\text{Au}] \quad \dots \text{(S1)}$$

where  $I_0$  and  $I$  denote the fluorescence intensities in absence and presence of quencher (gold complex) respectively,  $K_{SV}$  is the Stern Volmer quenching constant and  $[\text{Au}]$  is the concentration of the added gold complex. The results presented in Fig.S3 clearly indicate that the Stern - Volmer plot for all three gold complexes showed downward curves toward the x-axes suggesting in the simplest case, the existence of two distinct fluorophore populations, one of them not being accessible to the quencher.

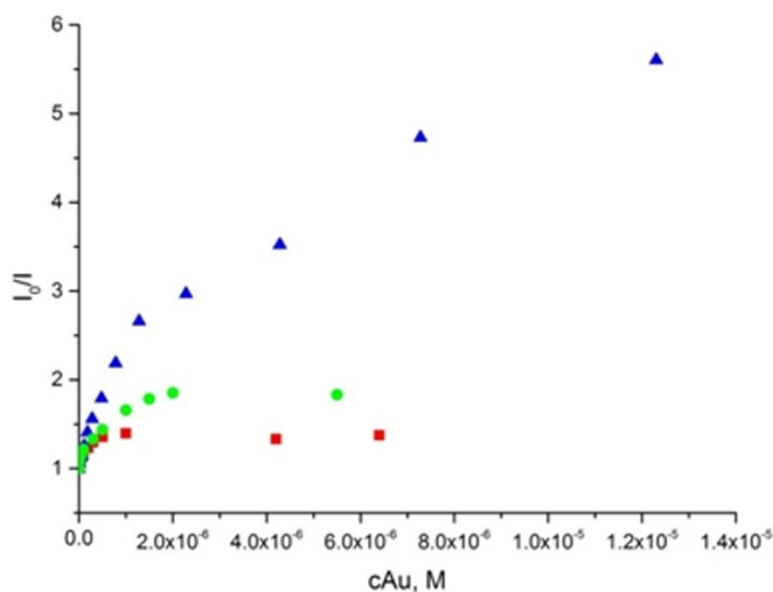

Fig. S3 Quenching curves of Na/K ATPase in the presence of gold complexes **1, 2 and 3**.

#### 4. Determination of free gold(III) complexes concentration from fluorescent measurements

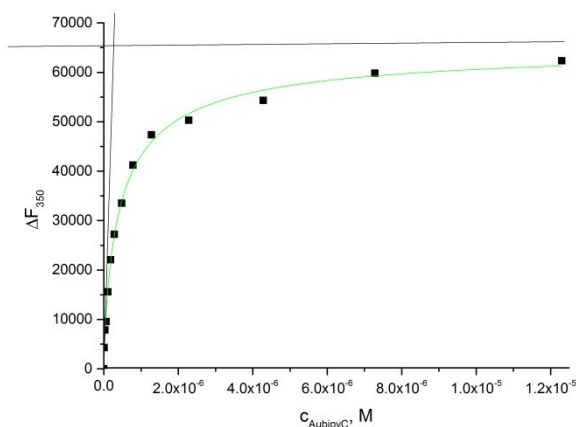

Fig. S4 Changes  $\Delta F_{350}$  vs. total added concentration of **complex 3**

Concentration of free gold complex in the solution is determined from differences the concentration of total added gold and the concentration of bound gold complex obtained from plot  $\Delta F_{350} = f c_{\text{totAu}}$

#### 5. CD spectra of Na/K ATPase after addition of gold complexes

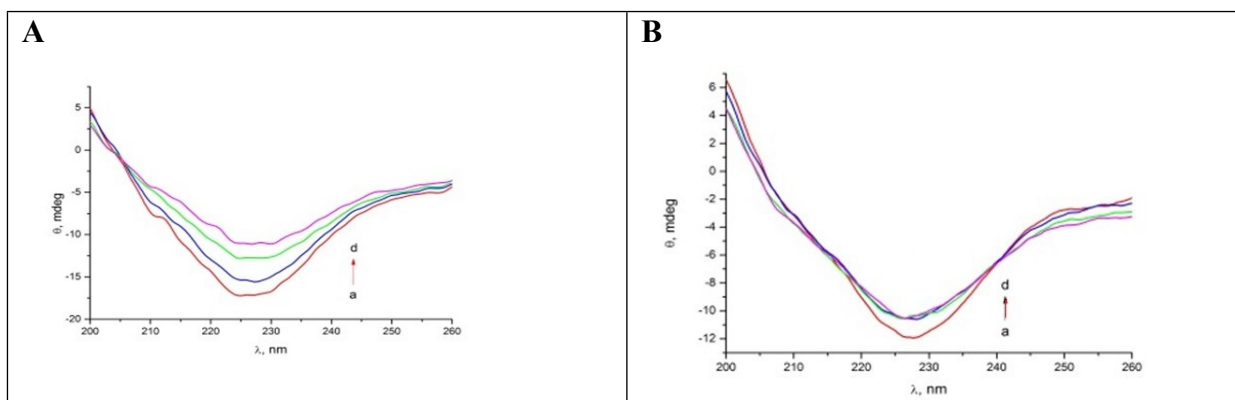

Fig.S5 CD spectra of  $2 \times 10^{-6}$  M Na/K ATPase in absence (a) and presence of increasing concentration of **complex 1** (A) and **complex 2** (B). The concentration of complexes was  $2 \times 10^{-6}$  -  $1 \times 10^{-5}$  M.

## 6. Docking studies

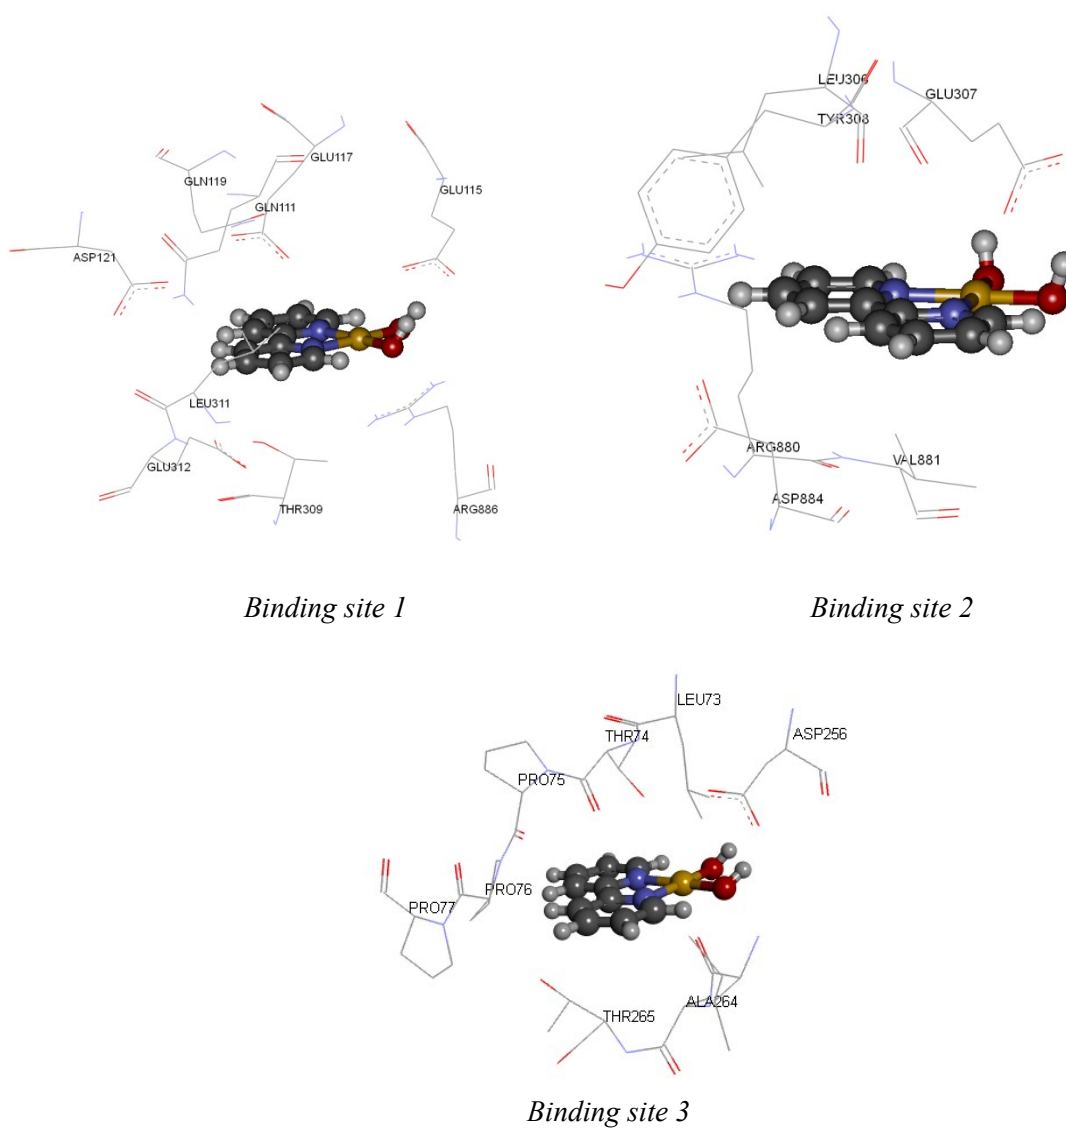

**Figure S6.** The illustration of interactions between complex **1** (displayed by ball and stick style) and amino acid residues at binding sites on Na/K-ATPase.

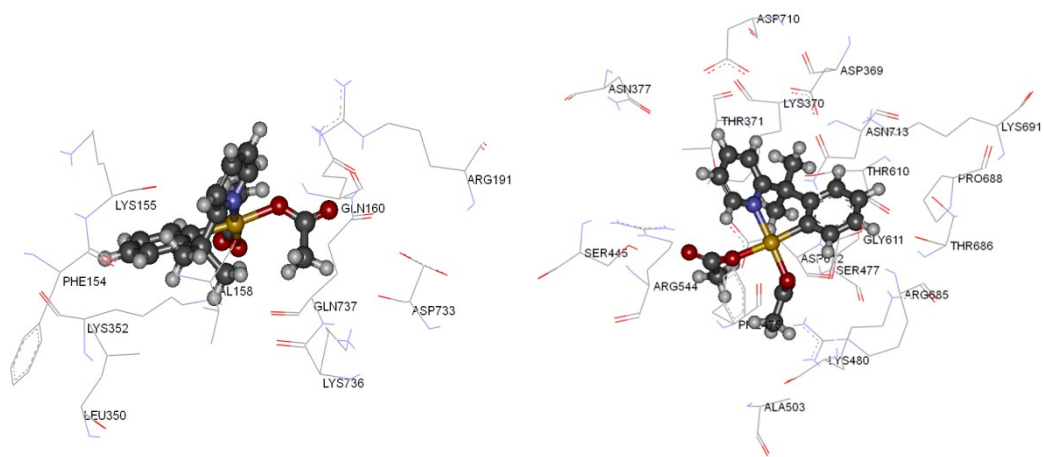

*Binding site 1*

*Binding site 2*

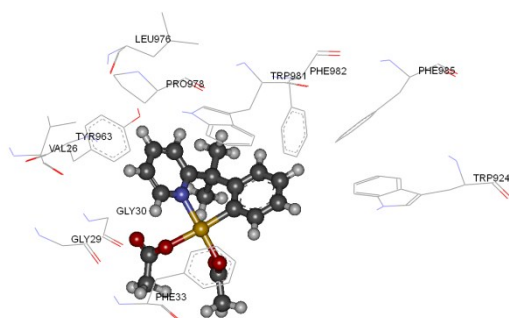

*Binding site 3*

**Figure S7.** The illustration of interactions between complex **2** (displayed by ball and stick style) and amino acid residues at binding sites on Na/K-ATPase.

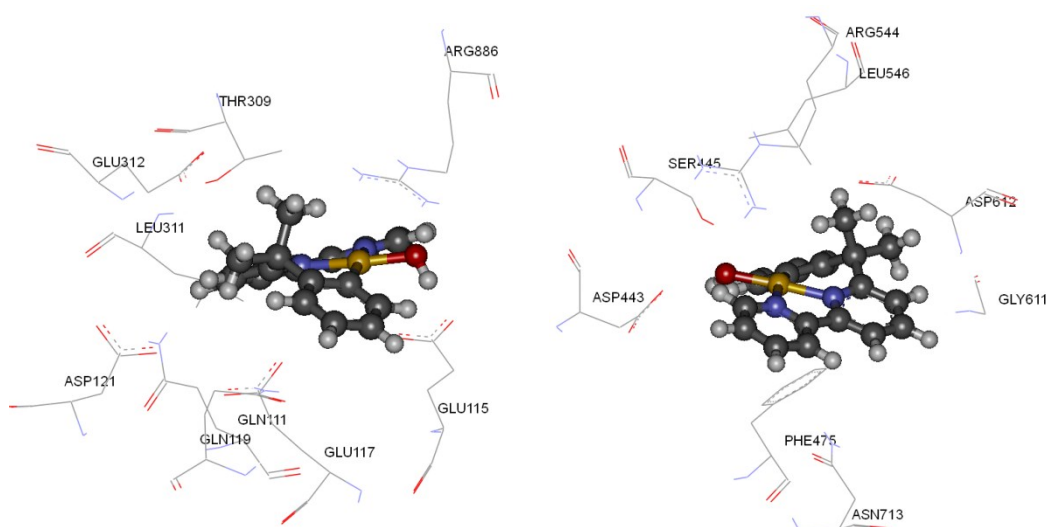

*Binding site 1*

*Binding site 2*

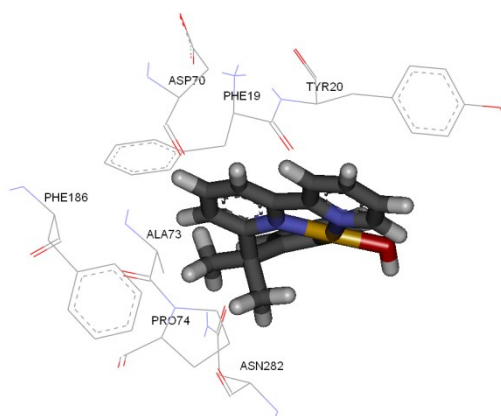

Binding site 3

**Figure S8.** The illustration of interactions between complex **3** (displayed by ball and stick style) and amino acid residues at binding sites on Na/K-ATPase.

**Table S1.** The distribution of tryptophane residues in environment of individual metal complex binding sites (with value of binding energy defined by distance up to 20 Å).

| Amino acid  | Aubipy(OH) <sub>2</sub> <sup>+</sup> |     |           | Aupy(OAc) <sub>2</sub> |     |          | AubipyC <sup>+</sup> |     |           | Σ   |   |
|-------------|--------------------------------------|-----|-----------|------------------------|-----|----------|----------------------|-----|-----------|-----|---|
|             | ΔE                                   | 1   | 2         | 3                      | 1   | 2        | 3                    | 1   | 2         |     | 3 |
| Trp82 (α)   | -                                    | -   | ***       | ***                    | -   | -        | -                    | -   | -         | -   | 1 |
| Trp98 (α)   | ***                                  | -   | -         | -                      | -   | -        | -                    | *** | -         | -   | 2 |
| Trp310 (α)  | ***                                  | *** | -         | -                      | -   | -        | -                    | *** | -         | -   | 3 |
| Trp385 (α)  | -                                    | -   | -         | -                      | *** | -        | -                    | -   | ***       | -   | 2 |
| Trp411 (α)  | -                                    | -   | -         | -                      | *** | -        | -                    | -   | ***       | -   | 2 |
| Trp883 (α)  | ***                                  | *** | -         | -                      | -   | ***      | ***                  | *** | -         | *** | 5 |
| Trp887 (α)  | ***                                  | *** | -         | -                      | -   | ***      | ***                  | *** | -         | *** | 5 |
| Trp899 (α)  | ***                                  | *** | -         | -                      | -   | ***      | ***                  | *** | -         | *** | 5 |
| Trp924 (α)  | -                                    | -   | -         | -                      | -   | -        | -                    | -   | -         | -   | 0 |
| Trp980 (α)  | -                                    | -   | -         | -                      | -   | -        | ***                  | -   | -         | *** | 2 |
| Trp981 (α)  | -                                    | -   | -         | -                      | -   | -        | ***                  | -   | -         | *** | 2 |
| Trp1009 (α) | -                                    | -   | -         | -                      | -   | -        | -                    | -   | -         | -   | 0 |
| Trp12 (β)   | -                                    | -   | -         | -                      | -   | -        | -                    | -   | -         | -   | 0 |
| Trp17 (β)   | -                                    | -   | -         | -                      | -   | -        | -                    | -   | -         | -   | 0 |
| Trp32 (β)   | -                                    | -   | -         | -                      | -   | -        | -                    | -   | -         | -   | 0 |
| Trp155 (β)  | -                                    | -   | -         | -                      | -   | -        | ***                  | -   | -         | *** | 2 |
| Σ           |                                      | 5   | 4         | 1                      | 1   | 2        | 6                    | 5   | 2         | 6   |   |
| Na          |                                      |     | <b>10</b> |                        |     | <b>9</b> |                      |     | <b>13</b> |     |   |
| Nb          |                                      |     | <b>6</b>  |                        |     | <b>9</b> |                      |     | <b>10</b> |     |   |

To describe an environment of tryptophan residues the program BIOVIA Discovery Studio Visualizer was used [2], in which there is option to select the all species in area around individual amino acids. We analysed only gold(III) complexes located at a distance shorter than 20 Å in respect to individual tryptophan residue. If the metal complex is located in environment of tryptophan residue the label (\*\*\*) is used, if not then we used the label (-).

**Na** is total number of tryptophan residues (with repeating of residues) obtained in environments of the same type Au complex, defined by distance up to 20 Å. **Nb** is total number of tryptophan residues (without repeating of residues) obtained in environments of the same type Au complex, defined by distance up to 20 Å.

## References

1. Nyblom, M., et al., *Crystal structure of Na<sup>+</sup>, K(+)-ATPase in the Na(+)-bound state*. Science, 2013. **342**(6154): p. 123-127.
2. Dassault Systèmes BIOVIA, Discovery Studio Modeling Environment, Release 2017, San Diego: Dassault Systèmes, 2016.
